# Supplementary figures and images for: Rapid and direct detection of attomole adenosine triphosphate (ATP) by MALDI-MS using rutile titania chips
Source: Royal Society of Chemistry journal article supplement (doi:10.1039/c2an35754b), 2012-01-01

Fig -S1

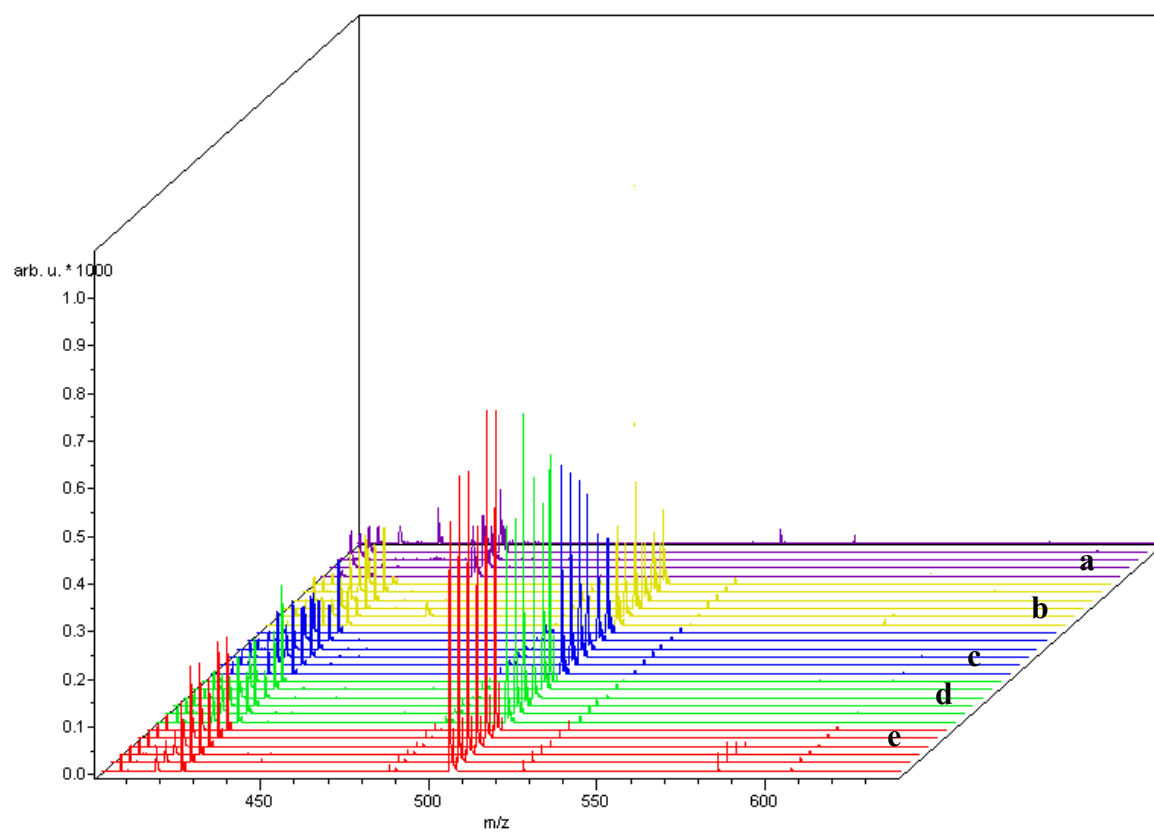

Fig -S2

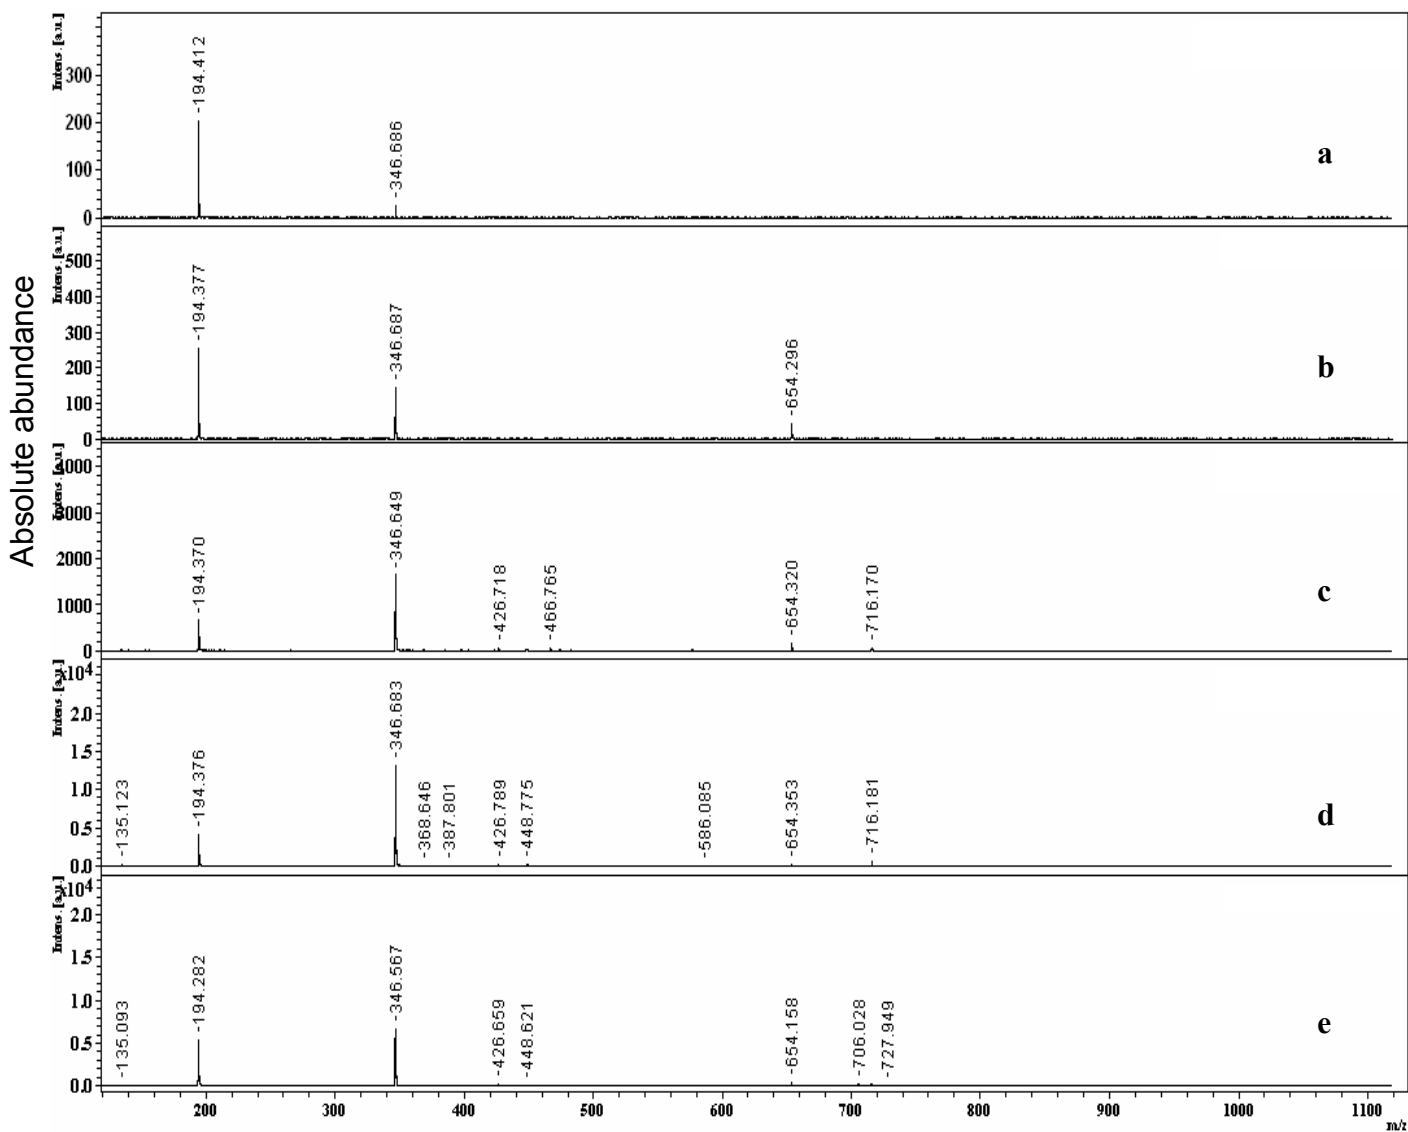

Fig -S3

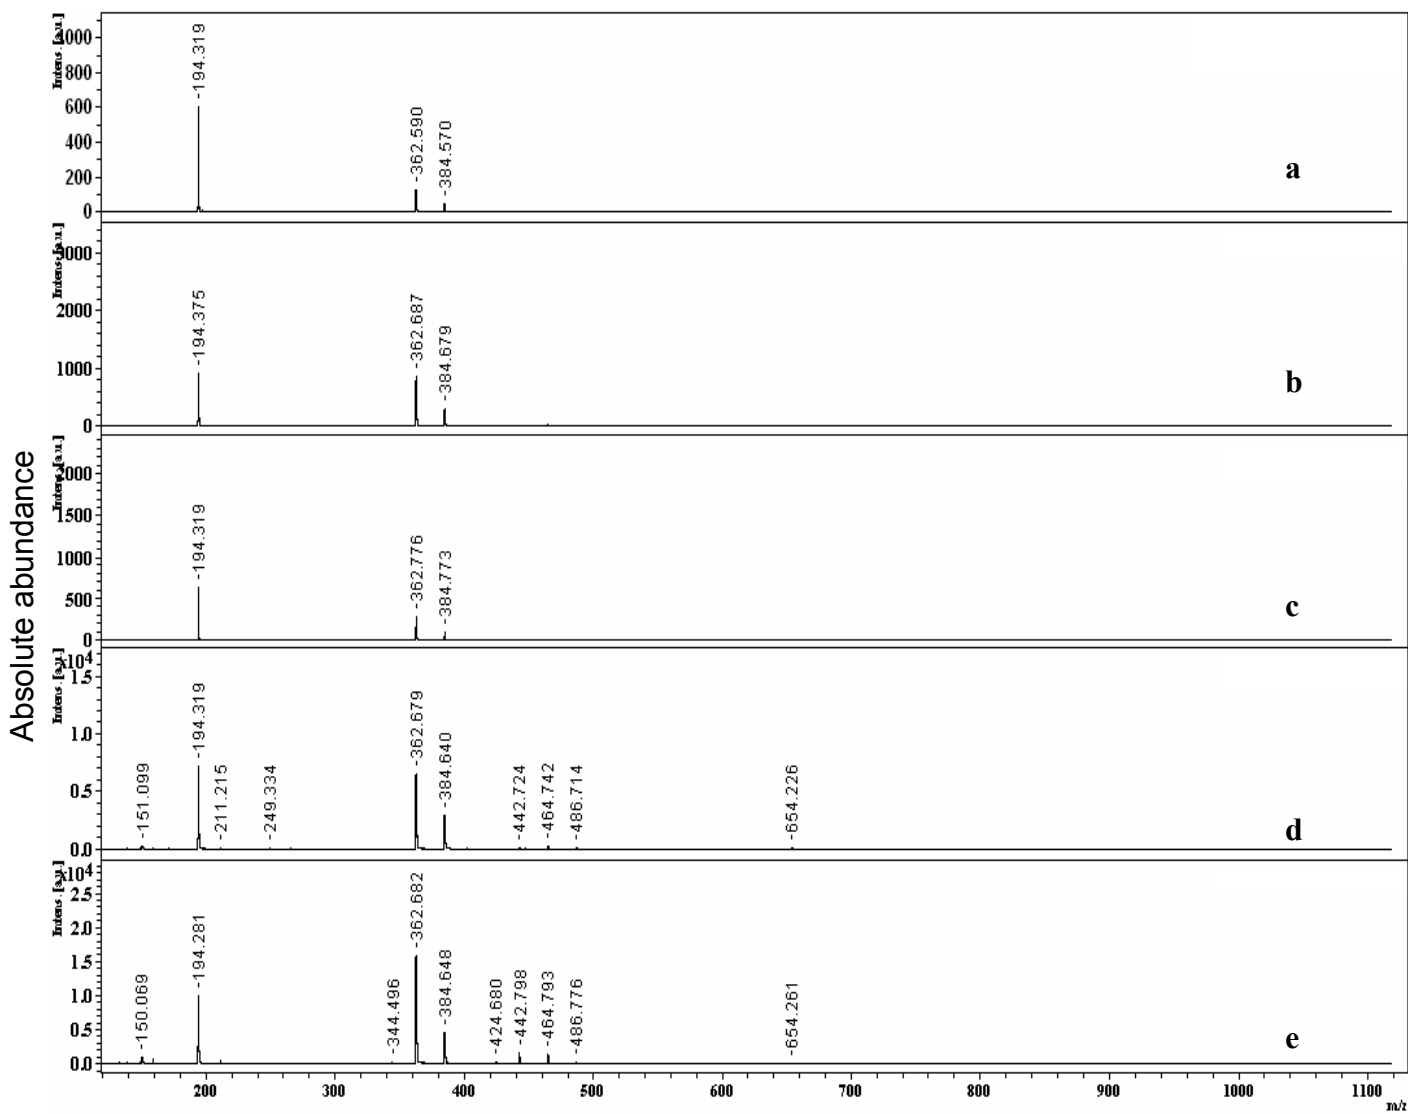

Supplement: c2an35754b.pdf [file c2an35754b.pdf]
